# Supplementary material for: Endothelial function as predictor in patients with coronary syndrome treated by percutaneous coronary intervention
Source: PubMed Central journal article supplement (PMC6435452; doi:10.1042/bsr20180732), 2018-10-15
Supplement: bsr20180732_Supp1.pdf [file bsr20180732_Supp1.pdf]

**Table S1. Baseline Characteristics of patients between MACEs and non-MACEs groups**

| Variable                          | MACEs positive<br>(n = 67) | MACEs negative<br>(n = 241) | p-value |
|-----------------------------------|----------------------------|-----------------------------|---------|
| Age, mean (SD), y                 | 60.27±9.43                 | 60.23±9.95                  | 0.947   |
| Male gender, n (%)                | 49(73.13%)                 | 187(77.59%)                 | 0.640   |
| BMI, mean (SD), kg/m <sup>2</sup> | 24.09±3.18                 | 24.70±2.84                  | 0.084   |
| LV mean (SD), mm                  | 47.46±6.47                 | 47.24±5.47                  | 0.919   |
| LVEF, mean (SD), %                | 58.94±10.01                | 61.41±7.84                  | 0.001** |
| BNP, Median (IQR), pg/mL          | 62.70±183.58               | 57.70±144.73                | 0.360   |
| Peripheral vascular disease       | 39(58.21%)                 | 156(64.73%)                 | 0.390   |
| Pre-PCI, n (%)                    | 4(5.97%)                   | 36(14.94%)                  | 0.064   |
| Pre-CABG, n (%)                   | 1(1.49%)                   | 0(0.00%)                    | 0.218   |
| Current smoking, n (%)            | 33(49.25%)                 | 129(53.53%)                 | 0.518   |
| Creatinine mean (SD), µmol/L      | 76.45±17.09                | 76.52±16.35                 | 0.073   |
| ALT, mean (SD), IU/L              | 33.10±27.85                | 33.11±23.98                 | 0.516   |
| AST, mean (SD), IU/L              | 29.12±20.87                | 27.20±18.46                 | 0.516   |
| Hypertension, n (%)               | 32(47.76%)                 | 101(41.91%)                 | 0.094   |
| Systolic BP, mean (SD), mm Hg     | 131.30±21.67               | 130.11±18.28                | 0.008** |
| Diastolic BP, mean (SD), mm Hg    | 77.36±11.90                | 78.21±11.81                 | 0.028*  |
| TC, mean (SD), mmol/L             | 4.15±1.41                  | 3.96±1.05                   | 0.397   |
| TG, mean (SD), mmol/L             | 1.75±1.12                  | 1.62±0.94                   | 0.819   |
| LDL, mean(SD), mmol/L             | 2.68±0.96                  | 2.59±0.69                   | 0.608   |
| HDL, mean(SD), mmol/L             | 1.02±0.24                  | 1.00±0.24                   | 0.432   |
| Diabetes mellitus, n (%)          | 22(32.84%)                 | 68(28.22%)                  | 0.453   |
| HbA1c, mean (SD), %               | 6.44±1.20                  | 6.77±1.61                   | 0.367   |
| Diagnosis                         |                            |                             | 0.981   |
| STEMI, n (%)                      | 14(20.90%)                 | 50(20.75%)                  |         |
| NSTEMI, n (%)                     | 4(5.97%)                   | 16(6.64%)                   |         |
| UA, n (%)                         | 49(73.13%)                 | 175(72.61%)                 |         |
| Medication                        |                            |                             |         |
| ACEI/ARB, n (%)                   | 44(65.67%)                 | 168(69.71%)                 | 0.553   |
| CCB, n (%)                        | 11(16.42%)                 | 39(16.18%)                  | 0.963   |
| β-blockers, n(%)                  | 55(82.09%)                 | 180(74.69%)                 | 0.256   |
| Antiplatelet                      |                            |                             |         |

|                              |            |             |       |
|------------------------------|------------|-------------|-------|
| aspirin + Clopidogrel, n (%) | 21(31.34%) | 89(36.93%)  | 0.472 |
| aspirin + Ticagrelor, n (%)  | 46(68.66%) | 152(63.70%) | 0.472 |
| Trimetazidine, n (%)         | 38(56.72%) | 133(55.19%) | 0.890 |
| Statins, n (%)               | 67(100%)   | 241(100%)   | 1.000 |

---

BMI, body mass index; LV, left ventricular end diastolic dimension; LVEF, left ventricular ejection fraction; PCIs, percutaneous coronary interventional treatments; CABG, cardiac artery bypass graft; ALT, aspartate aminotransferase; AST, aspartate transaminase; TC, total cholesterol; TG, triglyceride; HDL-C, high density lipoprotein cholesterol; LDL-C, low density lipoprotein cholesterol; STEMI, ST-Elevation Myocardial Infarction; NSTEMI, non ST-Elevation Myocardial Infarction; UA, unstable angina pectoris; CCB, calcium-channel blocker.

\*  $p \leq 0.05$ ; \*\*  $p \leq 0.01$ .

**Table S2. The coronary artery lesion characteristics of patients divided by MACEs**

|                                     | MACEs positive<br>(n = 67) | MACEs<br>negative<br>(n = 241) | p value |
|-------------------------------------|----------------------------|--------------------------------|---------|
| Number of diseased coronary vessels |                            |                                | 0.097   |
| One, n (%)                          | 17(25.37%)                 | 87(36.10%)                     |         |
| Two, n (%)                          | 17(25.37%)                 | 69(28.63%)                     |         |
| Three, n (%)                        | 33(49.26%)                 | 85(35.27%)                     |         |
| Thrombus lesions, n (%)             | 10(14.93%)                 | 20(8.30%)                      | 0.109   |
| Chronic total occlusion, n (%)      | 12(17.91%)                 | 36(14.94%)                     | 0.570   |
| Curve lesions, n (%)                | 3(4.48%)                   | 11(4.56%)                      | 1.000   |
| Calcificaton lesions, n (%)         | 11(16.41%)                 | 36(14.94%)                     | 0.848   |
| LM lesions, n (%)                   | 13(19.40%)                 | 32(13.28%)                     | 0.240   |
| Number of stents, n                 | 1.83±0.97                  | 1.93±0.98                      | 0.391   |
| Medina, 1,1,1, n (%)                | 17(25.37%)                 | 69(28.63%)                     | 0.647   |
| T/TAP technique, n (%)              | 2(2.99%)                   | 3(1.24%)                       | 0.299   |
| Crush/mini crush technique, n (%)   | 2(1.65%)                   | 6(3.14%)                       | 0.491   |
| BT/ BSKT technique, n (%)           | 2(2.99%)                   | 17(7.05%)                      | 0.387   |

SYNTAX score: Synergy Between PCI With Taxus and Cardiac Surgery score; T/TAP: T stenting and small protrusion technique; JBT: jailed-balloon technique; BSKT: balloon stent kissing technique. LM: Left main coronary artery;
